# Supplementary material
Source: PubMed Central journal article supplement (PMC3141923)
Supplement: 1103219108_pnas.201103219SI.pdf [file 1103219108_pnas.201103219SI.pdf]

# Supporting Information

Hong et al. 10.1073/pnas.1103219108

## SI Materials and Methods

### Site-Directed Mutant Generation and Measurements of a Maximum Growth Rate.

i) Steps for site-directed mutagenesis

Step 1) Two cassettes preparation by fusion PCR of Partial  $RAS2^{Tyr112}$  and  $URA3$

Partial  $RAS2^{Tyr112}$  (805 bp)

Partial 5' $URA3$  (716 bp)

Partial 3' $URA3$  (1,028 bp)

Partial  $RAS2^{Tyr112}$  (805 bp)

Transformation into CEN.PK113-5D ( $ura3$ )

Step 2) Homologous recombination for introducing  $RAS2^{Tyr112}$  with  $URA3$  marker

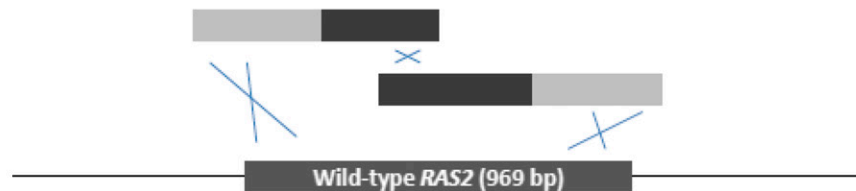

Spreading on uracil media

Step 3) Selection strains that have  $URA3$  marker

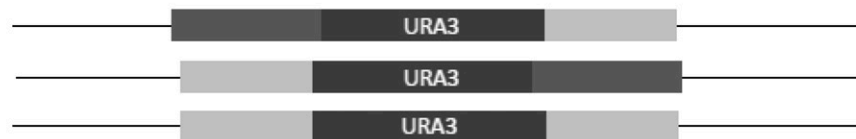

Streaking on 5-FOA media  
(5-Fluoroorotic Acid Monohydrate)

Step 4) Homologous recombination for looping out  $URA3$  marker by 5-FOA media based selection

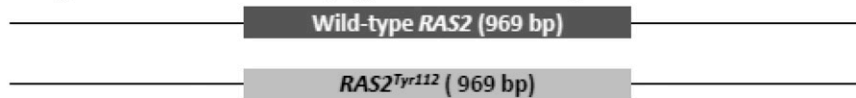

Colony PCR with mutant specific primers  
Whole  $RAS2$  gene sequencing

Step 5) Selection mutant ( $RAS2^{Tyr112}$ ) by PCR with mutants specific primers and confirming by sequencing

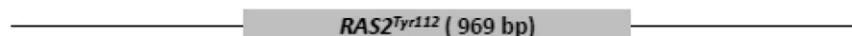

ii) Primer lists for construction of site-directed mutants

|                                           |                                                     |
|-------------------------------------------|-----------------------------------------------------|
| For fusion of <i>RAS2</i> and <i>URA3</i> |                                                     |
| RAS2-5P1                                  | CCACTCTTTATCTGACTCTTCTGC                            |
| RAS2-3P1                                  | GGAATTGCCATGAAGCCGAA<br>TTCACATTTTACC GTTGGCAGC     |
| For fusion of <i>RAS2</i> and <i>URA3</i> |                                                     |
| RAS2-5P2                                  | GGAATTCGATATCAAGCTTATCGAT                           |
| RAS2-3P2                                  | CCACTCTTTATCTGACTCTTCTGC<br>TTCACATTTTACC GTTGGCAGC |
| For selection of mutants                  |                                                     |
| RAS2-4BW (wild-type)                      | AATTGGAACATAGTCGGTATC                               |
| RAS2-4BM (mutant)                         | AATTGGAACATAGTCGGTATA                               |
| For sequencing of whole <i>RAS2</i> genes |                                                     |
| RAS2-5P                                   | GTTT TAGCCGTGTCTTCTCTT                              |
| RAS2-3P                                   | GTTCTTTTCGTCTTAGCGTTTC                              |

iii) Characterization of maximum growth rate of site-directed mutants in a flask culture

Biological triplicates of all strains were performed in flask scale. Uracil (150 mg/L) was supplied to galactose (20 g/L) minimal media. *P* value was calculated by assumption of one-tailed distribution and homoscedasticity.

**Batch Fermentation and Sampling.** Aerobic batch cultures were carried out in 1.0-L DasGip stirrer-pro vessels (DasGip) containing 0.8-L working volume. The same media with preculture was used, and the temperature was kept at 30 °C. The airflow rate was set to 1 L per liquid volume per minute, and the pH of the media was maintained at 5.0 by automatic addition of 2 M KOH. All conditions of temperature, agitation, air supply, pH, and off-gas analysis were controlled and monitored by the DasGip system. The concentration of dissolved oxygen was measured with an autoclavable polarographic oxygen electrode (Mettler Toledo). The off-gas from the bioreactors was analyzed for real-time determination of oxygen and carbon dioxide concentration by DasGip fedbatch pro gas analysis systems with the off gas analyzer 1 GA4 based on zirconium dioxide and two-beam infrared sensor (DasGip). Samples for measuring biomass and extracellular metabolites were obtained hourly after starting the exponential growth phase. When the concentration of carbon dioxide reached  $\approx 1.7\%$ , which was almost midexponential phase in the aerobic batch culture with 20 g/L galactose, samples for DNA microarray and intracellular metabolite analysis were taken.

**Transcriptome Analysis.** PCA was applied to normalized data from all strains by using the TM4 software (1). To find common changes and specific changes of evolved mutants, differentially expressed genes (Student's *t* test;  $P < 0.01$ ) were identified by comparison among all evolved mutants and the other strains. Differentially expressed genes were used as input to g:Profiler to find significantly changed metabolic pathways, reactions, and GO terms by using a cumulative hyper-geometric test (2). The results

were visualized by using software of MultiExperiment Viewer (Dana–Farber Cancer Institute).

**Metabolome Analysis.** The concentration of sugar phosphates was measured by ion chromatography (3). Quantification of redox cofactors was done by assay kits of BioVision. Free amino acids were quantified by EZ:faast amino acid analysis kit (Phenomex) by using gas chromatography-mass spectrometry. To analyze carbohydrates and sterols, harvested cells were directly used for extraction of those metabolites; 10 mg and 100 mg of dry cell weight were used, respectively. Trehalose and glycogen were quantified by measuring the amount of glucose released after treatment with enzymes that degrade these carbohydrates (4). Ergosterol and dihydroergosterol were identified by gas chromatography-mass spectrometry (5) and quantified by high performance liquid chromatography. It was difficult to find a standard for dihydroergosterol, and we therefore quantified this by using a standard curve with ergosterol. For hierarchical clustering, all quantified metabolites were standardized to *z* score to remove different weights for each metabolite. The result of the clustering was visualized by using the software of Multi-Experiment Viewer. To analyze significant changes in metabolite concentrations, a Student *t* test ( $P < 0.05$ ) was applied between the three evolved mutants and the reference strain, respectively. Venn diagram was used to represent common and specific features of all of the evolved mutants.

**Illumina/Solexa Genome Sequencing.** Genome Analyzer (GA-IIx) was used with sequencing cycles of  $2 \times 38 + 7$  (index) by Chrysalis 36 cycles version 4.0 as a sequencing kit. The Mapping and Assembly with Quality (MAQ) software version 0.7.1 (<http://maq.sourceforge.net>) was used with a maximum set at 2 mismatches in the first 24 bases on the reference sequence that was original CEN.PK113-7D genome sequence (6) available at the CENPK genome database ([www.sysbio.se/cenpk](http://www.sysbio.se/cenpk)). The MAQ software was then used to validate the mapping obtained by comparing the paired end of each read orientation and position. The maximal insert size was set to 400 base pairs for this process. The results from the mapping were further used for calling of single nucleotide polymorphisms (SNPs) and insertions and deletions (INDELS) in the reads compared with the reference sequence. The raw candidates of SNPs and InDels having identical mutations in all evolved mutants were removed for further comparative analysis, because those mutations came from the ancestor strain. It was confirmed by resequencing of some of identical mutations with an ancestor strain. Filtering for SNPs was done by selecting of SNPs with Phred-like consensus quality  $>30$  and a coverage depth  $>3$ . Some of INDELS were filtered out when the number of reads with INDELS was lower than the number of reads without INDELS. To perform annotation, GlimmerHMM was used for prediction the gene structures by training the gene models from strain CEN.PK113-7D and S288c (6). Especially, to calculate the coverage folds of gal genes in each evolved mutant, the count function of integrative genome viewer (IGV software) was used. A 200-bp window was set to estimate the average coverage folds. The results are summarized in [Dataset S2](#).

1. Saeed AI, et al. (2003) TM4: A free, open-source system for microarray data management and analysis. *Biotechniques* 34:374–378.
2. Reimand J, Kull M, Peterson H, Hansen J, Vilo J (2007) g:Profiler—a web-based toolset for functional profiling of gene lists from large-scale experiments. *Nucleic Acids Res* 35 (Web Server issue):W193–200.
3. Smits HP, Cohen A, Buttler T, Nielsen J, Olsson L (1998) Cleanup and analysis of sugar phosphates in biological extracts by using solid-phase extraction and anion-exchange chromatography with pulsed amperometric detection. *Anal Biochem* 261:36–42.

4. Parrou JL, François J (1997) A simplified procedure for a rapid and reliable assay of both glycogen and trehalose in whole yeast cells. *Anal Biochem* 248:186–188.
5. Kelly SL, et al. (1995) Purification and reconstitution of activity of *Saccharomyces cerevisiae* P450 61, a sterol delta 22-desaturase. *FEBS Lett* 377:217–220.
6. Otero JM, et al. (2010) Whole genome sequencing of *Saccharomyces cerevisiae*: From genotype to phenotype for improved metabolic engineering applications. *BMC Genomics* 11:723–740.

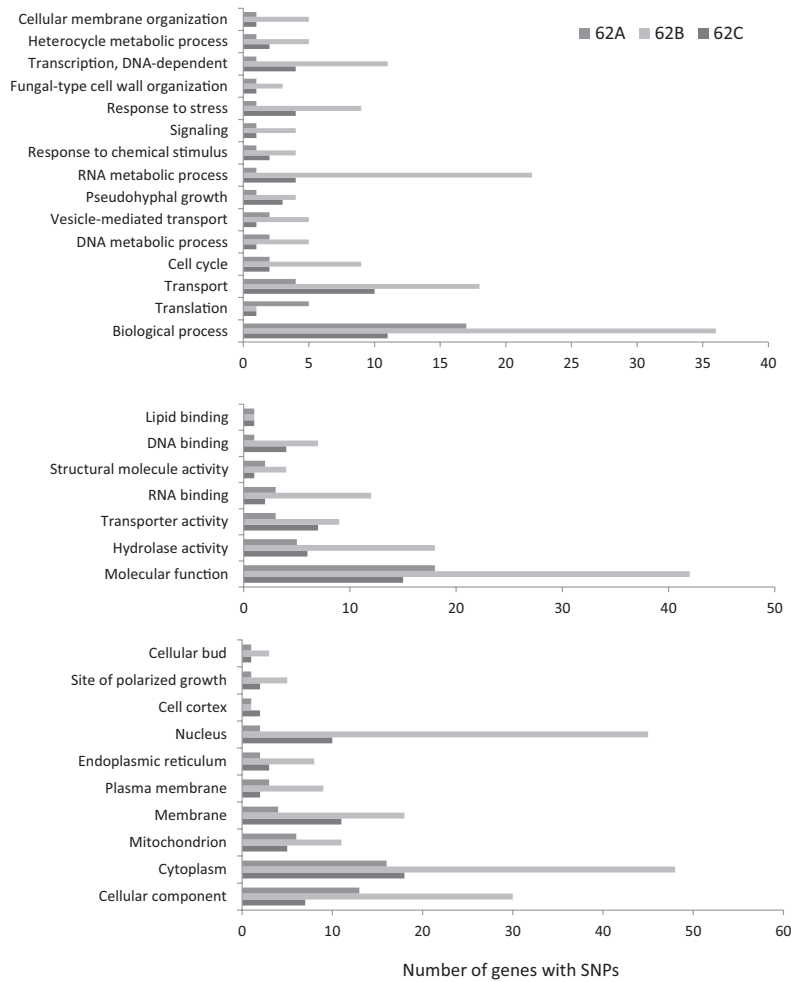

Fig. S1. Gene ontology (GO) enrichment analysis by GO slim mapper based on *S. cerevisiae* genome background.

Table S1. Characterization of phenotype in aerobic batch culture on galactose

| Strains | Maximum specific growth rate (h <sup>-1</sup> ) | Biomass yield (C-mol/C-mol galactose) | Ethanol yield (C-mol/C-mol galactose) | CO <sub>2</sub> yield (C-mol/C-mol galactose) |
|---------|-------------------------------------------------|---------------------------------------|---------------------------------------|-----------------------------------------------|
| REF     | 0.21 ± 0.00                                     | 0.46 ± 0.00                           | 0.13 ± 0.01                           | 0.39 ± 0.00                                   |
| SO16    | 0.17 ± 0.01                                     | 0.30 ± 0.01                           | 0.31 ± 0.01                           | 0.31 ± 0.00                                   |
| PGM2    | 0.21 ± 0.01                                     | 0.35 ± 0.02                           | 0.32 ± 0.02                           | 0.27 ± 0.03                                   |
| 62A     | 0.26 ± 0.00                                     | 0.48 ± 0.01                           | 0.14 ± 0.00                           | 0.31 ± 0.05                                   |
| 62B     | 0.26 ± 0.00                                     | 0.45 ± 0.00                           | 0.19 ± 0.01                           | 0.29 ± 0.02                                   |
| 62C     | 0.26 ± 0.00                                     | 0.41 ± 0.01                           | 0.26 ± 0.02                           | 0.30 ± 0.01                                   |

**Table S2. The concentration of measured metabolites**

| μmol/g DCW                       | REF-1 | REF-2 | SO16-1 | SO16-2 | PGM2-1 | PGM2-2 | 62A-1 | 62A-2 | 62B-1  | 62B-2 | 62C-1 | 62C-2 |
|----------------------------------|-------|-------|--------|--------|--------|--------|-------|-------|--------|-------|-------|-------|
| Galactose (intracellular)        | 149.0 | 169.1 | 72.2   | 114.7  | 117.5  | 139.4  | 215.5 | 309.0 | 198.5  | 240.7 | 136.5 | 179.3 |
| Galactitol                       | 29.37 | 40.23 | 19.42  | 20.88  | 12.20  | 16.71  | 29.93 | 35.98 | 35.42  | 33.74 | 35.53 | 34.79 |
| Galactose 1P                     | 0.618 | 0.751 | 0.373  | 0.396  | 0.242  | 0.272  | 0.225 | 0.346 | 0.279  | 0.411 | 0.278 | 0.290 |
| Glucose 1P                       | 0.279 | 0.310 | 0.106  | 0.115  | 0.037  | 0.032  | 0.054 | 0.078 | 0.061  | 0.090 | 0.051 | 0.057 |
| Glucose 6P                       | 0.246 | 0.305 | 0.209  | 0.200  | 0.155  | 0.199  | 0.181 | 0.229 | 0.207  | 0.208 | 0.227 | 0.242 |
| Fructose 6P                      | 0.051 | 0.068 | 0.052  | 0.044  | 0.037  | 0.050  | 0.041 | 0.060 | 0.048  | 0.042 | 0.051 | 0.056 |
| Fructose 1,6 dP                  | 0.540 | 0.620 | 0.954  | 0.817  | 0.570  | 0.711  | 0.630 | 0.539 | 1.828  | 2.246 | 0.650 | 0.627 |
| ATP                              | 3.380 | 3.857 | 3.073  | 2.746  | 2.003  | 2.122  | 3.381 | 3.221 | 3.422  | 4.359 | 2.950 | 2.934 |
| ADP                              | 0.668 | 0.683 | 0.594  | 0.532  | 0.372  | 0.409  | 0.512 | 0.522 | 0.512  | 0.559 | 0.440 | 0.418 |
| AMP                              | 0.041 | 0.045 | 0.059  | 0.043  | 0.033  | 0.043  | 0.047 | 0.048 | 0.056  | 0.048 | 0.033 | 0.033 |
| NADPH                            | 0.167 | 0.256 | 0.126  | 0.202  | 0.139  | 0.177  | 0.090 | 0.097 | 0.183  | 0.133 | 0.099 | 0.180 |
| NADP                             | 0.277 | 0.306 | 0.197  | 0.231  | 0.173  | 0.266  | 0.287 | 0.299 | 0.235  | 0.248 | 0.220 | 0.318 |
| NADH                             | 0.275 | 0.301 | 0.212  | 0.201  | 0.115  | 0.207  | 0.186 | 0.223 | 0.149  | 0.094 | 0.210 | 0.253 |
| NAD                              | 3.989 | 5.057 | 2.814  | 2.752  | 2.360  | 3.566  | 3.956 | 4.032 | 2.585  | 1.517 | 4.076 | 3.396 |
| Alanine                          | 0.683 | 0.768 | 0.478  | 0.390  | 0.475  | 0.797  | 0.813 | 0.949 | 1.010  | 0.798 | 0.793 | 0.832 |
| Glycine                          | 0.571 | 0.516 | 0.361  | 0.339  | 0.315  | 0.524  | 0.411 | 0.468 | 0.648  | 0.699 | 0.450 | 0.468 |
| Valine                           | 0.323 | 0.293 | 0.152  | 0.159  | 0.179  | 0.284  | 0.305 | 0.261 | 0.479  | 0.431 | 0.260 | 0.282 |
| Leucine                          | 0.106 | 0.095 | 0.096  | 0.091  | 0.071  | 0.104  | 0.136 | 0.110 | 0.159  | 0.149 | 0.093 | 0.115 |
| Isoleucine                       | 0.096 | 0.074 | 0.047  | 0.052  | 0.049  | 0.080  | 0.063 | 0.093 | 0.155  | 0.116 | 0.045 | 0.081 |
| Threonine                        | 0.844 | 0.736 | 0.608  | 0.600  | 0.666  | 0.885  | 0.918 | 0.891 | 1.494  | 1.342 | 0.676 | 0.902 |
| Proline                          | 0.226 | 0.178 | 0.000  | 0.000  | 0.036  | 0.106  | 0.233 | 0.255 | 0.240  | 0.247 | 0.293 | 0.345 |
| Asparagine                       | 0.298 | 0.266 | 0.243  | 0.239  | 0.220  | 0.323  | 0.344 | 0.321 | 0.494  | 0.459 | 0.253 | 0.297 |
| Aspartic Acid                    | 2.247 | 1.890 | 1.377  | 1.428  | 1.618  | 1.835  | 2.846 | 2.288 | 2.910  | 2.788 | 2.296 | 2.499 |
| Phenylalanine                    | 0.040 | 0.053 | 0.018  | 0.021  | 0.037  | 0.033  | 0.055 | 0.012 | 0.094  | 0.097 | 0.023 | 0.043 |
| Glutamic acid                    | 7.528 | 7.467 | 4.897  | 4.720  | 5.511  | 7.474  | 8.076 | 7.361 | 10.288 | 9.354 | 7.057 | 7.623 |
| Glutamine                        | 2.432 | 1.685 | 1.075  | 1.553  | 1.008  | 1.823  | 3.765 | 2.921 | 5.588  | 5.611 | 2.949 | 2.912 |
| Lysine                           | 0.676 | 0.696 | 0.701  | 0.684  | 0.672  | 0.996  | 0.842 | 0.768 | 1.026  | 0.938 | 0.617 | 0.601 |
| Histidine                        | 0.586 | 0.601 | 0.722  | 0.712  | 0.533  | 0.805  | 0.821 | 0.775 | 0.782  | 0.681 | 0.492 | 0.519 |
| Tyrosine                         | 0.269 | 0.272 | 0.302  | 0.292  | 0.265  | 0.331  | 0.340 | 0.311 | 0.408  | 0.365 | 0.230 | 0.246 |
| Trehalose                        | 2.37  | 2.47  | 5.09   | 4.49   | 2.22   | 3.99   | 10.80 | 10.36 | 17.90  | 17.70 | 10.65 | 9.91  |
| Glycogen [mg (as glucose)/g DCW] | 26.33 | 26.22 | 37.04  | 37.34  | 24.22  | 25.67  | 53.20 | 53.04 | 33.18  | 33.00 | 49.68 | 48.05 |
| Ergosterol                       | 27.60 | 26.61 | 28.95  | 28.11  | 19.06  | 20.66  | 18.52 | 18.00 | 3.02   | 3.23  | 19.51 | 18.94 |
| Dihydroergosterol*               | 1.16  | 1.19  | 1.88   | 1.75   | 0.90   | 0.96   | 0.75  | 0.79  | 32.79  | 37.06 | 0.85  | 0.80  |

\*Dihydroergosterol was estimate from ergosterol standard curve.

**Table S3. Overall Illumina/Solexa genome sequencing results**

| Sequencing parameters                  | 62A         | 62B         | 62C         |
|----------------------------------------|-------------|-------------|-------------|
| No. of reads                           | 5,605,504   | 18,203,846  | 5,239,106   |
| Total bases,* bp                       | 213,009,152 | 691,746,148 | 199,086,028 |
| Coverage fold                          | 17          | 55          | 16          |
| Undetermined base                      | 158,723     | 86,791      | 171,362     |
| Genome percent reference coverage, † % | 98.7        | 99.3        | 98.6        |
| No. of supercontigs                    | 17          | 17          | 17          |
| Chromosomes                            | 16          | 16          | 16          |
| Mitochondria                           | 1           | 1           | 1           |

\*38 bases per sequence read for two cycles.

†Based on genome consensus sequence length of CEN.PK113-7D of 12,155,742 base pairs.

**Table S4. Detection of mutations across different genomes**

| Sequencing parameters                    | 62A/others* | 62B/others | 62C/others |
|------------------------------------------|-------------|------------|------------|
| Total number of mutations                | 44          | 334        | 40         |
| Total number of SNPs                     | 21          | 104        | 29         |
| Coding region                            | 6           | 29         | 11         |
| Noncoding region                         | 15          | 75         | 18         |
| Total number of insertions and deletions | 23          | 230        | 11         |
| Coding region                            | 0           | 11         | 3          |
| Noncoding region                         | 23          | 219        | 8          |

\*All other strains including the reference strain, CEN.PK113-7D and the other evolved strains.

**Table S5. Characterization of maximum growth rate of site-directed mutants in flask culture**

| Strain       | Genotype                                             | $U_{\max}$ | STD ( $n = 3$ ) | Increase, % | $t$ test ( $P$ value) |
|--------------|------------------------------------------------------|------------|-----------------|-------------|-----------------------|
| CEN.PK117-5D | <i>MATa MAL2-8c SUC2 ura3</i>                        | 0.199      | 0.013           | —           | —                     |
| RB           | <i>MATa MAL2-8c SUC2 ura3 RAS2<sup>Tyr-112</sup></i> | 0.219      | 0.010           | 10          | 0.05                  |

## Other Supporting Information Files

[Dataset S1 \(XLS\)](#)

[Dataset S2 \(XLS\)](#)
